# Supplementary material
Source: publisher figshare collection journal article supplement (https://acs.figshare.com/ndownloader/files/6923180)
Supplement: Supplementary file 1 [file 6923180]

 
data_gr6_0m
 
_audit_creation_method            SHELXL-97
_chemical_name_systematic
;
 ?
;
_chemical_name_common             ?
_chemical_melting_point           ?
_chemical_formula_moiety          'C42 H46 B N O2 Pt S'
_chemical_formula_sum
 'C42 H46 B N O2 Pt S'
_chemical_formula_weight          834.76
 
loop_
 _atom_type_symbol
 _atom_type_description
 _atom_type_scat_dispersion_real
 _atom_type_scat_dispersion_imag
 _atom_type_scat_source
 'C'  'C'   0.0033   0.0016
 'International Tables Vol C Tables 4.2.6.8 and 6.1.1.4'
 'N'  'N'   0.0061   0.0033
 'International Tables Vol C Tables 4.2.6.8 and 6.1.1.4'
 'O'  'O'   0.0106   0.0060
 'International Tables Vol C Tables 4.2.6.8 and 6.1.1.4'
 'B'  'B'   0.0013   0.0007
 'International Tables Vol C Tables 4.2.6.8 and 6.1.1.4'
 'Pt'  'Pt'  -1.7033   8.3905
 'International Tables Vol C Tables 4.2.6.8 and 6.1.1.4'
 'S'  'S'   0.1246   0.1234
 'International Tables Vol C Tables 4.2.6.8 and 6.1.1.4'
 'H'  'H'   0.0000   0.0000
 'International Tables Vol C Tables 4.2.6.8 and 6.1.1.4'
 
_symmetry_cell_setting            'monoclinic'
_symmetry_space_group_name_H-M    'C c'
_space_group_name_Hall            'C -2yc'
 
loop_
 _symmetry_equiv_pos_as_xyz
 'x, y, z'
 'x, -y, z+1/2'
 'x+1/2, y+1/2, z'
 'x+1/2, -y+1/2, z+1/2'
 
_cell_length_a                    11.901(5)
_cell_length_b                    22.056(9)
_cell_length_c                    15.274(6)
_cell_angle_alpha                 90.00
_cell_angle_beta                  111.977(11)
_cell_angle_gamma                 90.00
_cell_volume                      3718(3)
_cell_formula_units_Z             4
_cell_measurement_temperature     293(2)
_cell_measurement_reflns_used     ?
_cell_measurement_theta_min       ?
_cell_measurement_theta_max       ?
 
_exptl_crystal_description        'needle'
_exptl_crystal_colour             'Orange'
_exptl_crystal_size_max           0.9
_exptl_crystal_size_mid           0.7
_exptl_crystal_size_min           0.7
_exptl_crystal_density_meas       ?
_exptl_crystal_density_diffrn     1.491
_exptl_crystal_density_method     'not measured'
_exptl_crystal_F_000              1680
_exptl_absorpt_coefficient_mu     3.866
_exptl_absorpt_correction_type    'empirical'
_exptl_absorpt_correction_T_min   0.025
_exptl_absorpt_correction_T_max   0.067
_exptl_absorpt_process_details    ?
 
_exptl_special_details
;
 ?
;
 
_diffrn_ambient_temperature       293(2)
_diffrn_radiation_wavelength      0.71073
_diffrn_radiation_type            MoK\a
_diffrn_radiation_source          'fine-focus sealed tube'
_diffrn_radiation_monochromator   graphite
_diffrn_measurement_device_type   'bruker'
_diffrn_measurement_method        ?
_diffrn_detector_area_resol_mean  ?
_diffrn_standards_number          ?
_diffrn_standards_interval_count  ?
_diffrn_standards_interval_time   ?
_diffrn_standards_decay_%         ?
_diffrn_reflns_number             34692
_diffrn_reflns_av_R_equivalents   0.0505
_diffrn_reflns_av_sigmaI/netI     0.0519
_diffrn_reflns_limit_h_min        -15
_diffrn_reflns_limit_h_max        15
_diffrn_reflns_limit_k_min        -27
_diffrn_reflns_limit_k_max        28
_diffrn_reflns_limit_l_min        -19
_diffrn_reflns_limit_l_max        19
_diffrn_reflns_theta_min          2.93
_diffrn_reflns_theta_max          27.46
_reflns_number_total              8282
_reflns_number_gt                 6495
_reflns_threshold_expression      >2\s(I)
 
_computing_data_collection        ?
_computing_cell_refinement        ?
_computing_data_reduction         ?
_computing_structure_solution     ?
_computing_structure_refinement   'SHELXL-97 (Sheldrick, 2008)'
_computing_molecular_graphics     ?
_computing_publication_material   ?
 
_refine_special_details
;
 Refinement of F^2^ against ALL reflections.  The weighted R-factor wR and
 goodness of fit S are based on F^2^, conventional R-factors R are based
 on F, with F set to zero for negative F^2^. The threshold expression of
 F^2^ > 2\s(F^2^) is used only for calculating R-factors(gt) etc. and is
 not relevant to the choice of reflections for refinement.  R-factors based
 on F^2^ are statistically about twice as large as those based on F, and R-
 factors based on ALL data will be even larger.
;
 
_refine_ls_structure_factor_coef  Fsqd
_refine_ls_matrix_type            full
_refine_ls_weighting_scheme       calc
_refine_ls_weighting_details
 'calc w=1/[\s^2^(Fo^2^)+(0.0591P)^2^+2.0159P] where P=(Fo^2^+2Fc^2^)/3'
_atom_sites_solution_primary      direct
_atom_sites_solution_secondary    difmap
_atom_sites_solution_hydrogens    geom
_refine_ls_hydrogen_treatment     mixed
_refine_ls_extinction_method      none
_refine_ls_extinction_coef        ?
_refine_ls_abs_structure_details
 'Flack H D (1983), Acta Cryst. A39, 876-881'
_refine_ls_abs_structure_Flack    0.497(17)
_refine_ls_number_reflns          8282
_refine_ls_number_parameters      416
_refine_ls_number_restraints      2
_refine_ls_R_factor_all           0.0648
_refine_ls_R_factor_gt            0.0396
_refine_ls_wR_factor_ref          0.1119
_refine_ls_wR_factor_gt           0.0941
_refine_ls_goodness_of_fit_ref    1.121
_refine_ls_restrained_S_all       1.121
_refine_ls_shift/su_max           0.12
_refine_ls_shift/su_mean          0.082
 
loop_
 _atom_site_label
 _atom_site_type_symbol
 _atom_site_fract_x
 _atom_site_fract_y
 _atom_site_fract_z
 _atom_site_U_iso_or_equiv
 _atom_site_adp_type
 _atom_site_occupancy
 _atom_site_symmetry_multiplicity
 _atom_site_calc_flag
 _atom_site_refinement_flags
 _atom_site_disorder_assembly
 _atom_site_disorder_group
Pt1 Pt 0.50421(16) 0.414570(9) 0.49745(12) 0.04037(9) Uani 1 1 d . . .
C5 C 0.5263(7) 0.2834(3) 0.5502(3) 0.055(4) Uani 1 1 d G . .
C4 C 0.5571(6) 0.2360(2) 0.6150(4) 0.0140(15) Uiso 1 1 d G . .
H5A H 0.5463 0.1961 0.5939 0.017 Uiso 1 1 calc R . .
C3 C 0.6039(7) 0.2483(3) 0.7112(3) 0.072(3) Uani 1 1 d G . .
H10 H 0.6245 0.2166 0.7545 0.086 Uiso 1 1 calc R . .
C2 C 0.6200(9) 0.3080(4) 0.7427(4) 0.114(6) Uani 1 1 d G . .
H2A H 0.6513 0.3162 0.8071 0.137 Uiso 1 1 calc R . .
C1 C 0.5892(9) 0.3554(3) 0.6780(7) 0.088(6) Uani 1 1 d G . .
H3A H 0.5999 0.3953 0.6991 0.105 Uiso 1 1 calc R . .
N1 N 0.5423(8) 0.3431(3) 0.5818(6) 0.050(3) Uani 1 1 d G . .
O1 O 0.4565(11) 0.4798(5) 0.3924(7) 0.057(3) Uani 1 1 d . . .
O2 O 0.5477(9) 0.4785(4) 0.5972(6) 0.041(2) Uani 1 1 d . . .
C30 C 0.6209(15) 0.9138(5) 0.4362(11) 0.038(4) Uani 1 1 d . . .
B1 B 0.5071(17) 0.8345(3) 0.4983(14) 0.0309(13) Uani 1 1 d . . .
C37 C 0.4159(13) 0.9260(6) 0.7246(9) 0.039(3) Uani 1 1 d . . .
C18 C 0.5037(16) 0.7622(2) 0.4974(13) 0.0242(9) Uani 1 1 d . . .
C34 C 0.4812(11) 0.8697(5) 0.5764(9) 0.033(3) Uani 1 1 d . . .
C40 C 0.6397(13) 0.8107(6) 0.7049(8) 0.050(4) Uani 1 1 d . . .
H12A H 0.6472 0.7942 0.6492 0.075 Uiso 1 1 calc R . .
H12B H 0.6218 0.7787 0.7402 0.075 Uiso 1 1 calc R . .
H12C H 0.7144 0.8299 0.7431 0.075 Uiso 1 1 calc R . .
C27 C 0.4922(13) 0.8846(6) 0.2509(10) 0.050(4) Uani 1 1 d . . .
H14 H 0.4475 0.8757 0.1879 0.060 Uiso 1 1 calc R . .
C26 C 0.4649(11) 0.8555(5) 0.3225(8) 0.031(3) Uani 1 1 d . . .
C39 C 0.5385(13) 0.8569(6) 0.6769(9) 0.044(3) Uani 1 1 d . . .
C32 C 0.6220(18) 0.9558(8) 0.1897(14) 0.088(6) Uani 1 1 d . . .
H17A H 0.5642 0.9415 0.1306 0.131 Uiso 1 1 calc R . .
H17B H 0.7018 0.9430 0.1963 0.131 Uiso 1 1 calc R . .
H17C H 0.6193 0.9993 0.1914 0.131 Uiso 1 1 calc R . .
C23 C 0.2890(11) 0.7626(6) 0.4906(9) 0.041(3) Uani 1 1 d . . .
H18A H 0.2289 0.7330 0.4882 0.061 Uiso 1 1 calc R . .
H18B H 0.2597 0.7871 0.4346 0.061 Uiso 1 1 calc R . .
H18C H 0.3053 0.7879 0.5451 0.061 Uiso 1 1 calc R . .
C21 C 0.7111(14) 0.6301(7) 0.4964(12) 0.061(4) Uani 1 1 d . . .
H19A H 0.6953 0.5876 0.4987 0.092 Uiso 1 1 calc R . .
H19B H 0.7816 0.6410 0.5503 0.092 Uiso 1 1 calc R . .
H19C H 0.7249 0.6389 0.4397 0.092 Uiso 1 1 calc R . .
C16 C 0.6045(11) 0.6658(6) 0.4972(8) 0.036(3) Uani 1 1 d . . .
C38 C 0.5068(14) 0.8859(7) 0.7432(9) 0.051(4) Uani 1 1 d . . .
H21 H 0.5518 0.8772 0.8063 0.061 Uiso 1 1 calc R . .
C6 C 0.4796(8) 0.2933(4) 0.4477(7) 0.032(2) Uani 1 1 d . . .
C24 C 0.2905(12) 0.6313(6) 0.5026(11) 0.051(4) Uani 1 1 d . . .
H23A H 0.3075 0.5886 0.5057 0.076 Uiso 1 1 calc R . .
H23B H 0.2210 0.6399 0.4466 0.076 Uiso 1 1 calc R . .
H23C H 0.2745 0.6433 0.5572 0.076 Uiso 1 1 calc R . .
C31 C 0.3608(12) 0.8091(7) 0.2883(10) 0.057(4) Uani 1 1 d . . .
H24A H 0.3478 0.7923 0.3417 0.085 Uiso 1 1 calc R . .
H24B H 0.3814 0.7773 0.2542 0.085 Uiso 1 1 calc R . .
H24C H 0.2882 0.8289 0.2477 0.085 Uiso 1 1 calc R . .
C17 C 0.6086(9) 0.7296(5) 0.4950(8) 0.029(3) Uani 1 1 d . . .
C9 C 0.4606(10) 0.3487(4) 0.4007(7) 0.029(2) Uani 1 1 d . . .
C10 C 0.4188(16) 0.5734(6) 0.3254(10) 0.057(4) Uani 1 1 d . . .
H27A H 0.3900 0.5492 0.2690 0.086 Uiso 1 1 calc R . .
H27B H 0.4827 0.5995 0.3240 0.086 Uiso 1 1 calc R . .
H27C H 0.3535 0.5975 0.3290 0.086 Uiso 1 1 calc R . .
C14 C 0.5898(19) 0.5735(7) 0.6842(11) 0.077(5) Uani 1 1 d . . .
H28A H 0.6097 0.5440 0.7339 0.115 Uiso 1 1 calc R . .
H28B H 0.5258 0.5992 0.6867 0.115 Uiso 1 1 calc R . .
H28C H 0.6599 0.5977 0.6920 0.115 Uiso 1 1 calc R . .
C19 C 0.4056(11) 0.7304(6) 0.4966(8) 0.038(3) Uani 1 1 d . . .
C29 C 0.6515(13) 0.9405(6) 0.3704(9) 0.045(3) Uani 1 1 d . . .
H30 H 0.7155 0.9679 0.3884 0.054 Uiso 1 1 calc R . .
C11 C 0.4646(13) 0.5340(6) 0.4071(10) 0.044(4) Uani 1 1 d . . .
C20 C 0.4014(11) 0.6670(6) 0.4996(9) 0.037(3) Uani 1 1 d . . .
C15 C 0.4989(17) 0.6349(2) 0.4948(13) 0.0383(14) Uani 1 1 d . . .
C28 C 0.5893(18) 0.9283(7) 0.2753(13) 0.062(5) Uani 1 1 d . . .
C36 C 0.3571(14) 0.9406(7) 0.6324(11) 0.054(4) Uani 1 1 d . . .
H35 H 0.2953 0.9692 0.6180 0.065 Uiso 1 1 calc R . .
C22 C 0.7212(11) 0.7629(5) 0.4980(10) 0.045(3) Uani 1 1 d . . .
H36A H 0.7067 0.8058 0.4956 0.067 Uiso 1 1 calc R . .
H36B H 0.7407 0.7511 0.4449 0.067 Uiso 1 1 calc R . .
H36C H 0.7875 0.7530 0.5554 0.067 Uiso 1 1 calc R . .
C33 C 0.6966(14) 0.9324(7) 0.5383(11) 0.060(4) Uani 1 1 d . . .
H38A H 0.6688 0.9105 0.5808 0.089 Uiso 1 1 calc R . .
H38B H 0.6880 0.9751 0.5457 0.089 Uiso 1 1 calc R . .
H38C H 0.7803 0.9230 0.5523 0.089 Uiso 1 1 calc R . .
C42 C 0.3832(17) 0.9532(7) 0.7949(12) 0.064(5) Uani 1 1 d . . .
H39A H 0.3141 0.9790 0.7658 0.096 Uiso 1 1 calc R . .
H39B H 0.4497 0.9770 0.8358 0.096 Uiso 1 1 calc R . .
H39C H 0.3633 0.9224 0.8310 0.096 Uiso 1 1 calc R . .
C12 C 0.5092(18) 0.5665(3) 0.4996(15) 0.0423(16) Uani 1 1 d . . .
S1 S 0.4510(4) 0.22949(16) 0.3758(3) 0.0868(13) Uani 1 1 d . . .
C7 C 0.4062(12) 0.2832(8) 0.2748(8) 0.085(5) Uani 1 1 d . . .
H42 H 0.3774 0.2720 0.2115 0.102 Uiso 1 1 calc R . .
C8 C 0.4216(10) 0.3413(6) 0.3070(6) 0.051(3) Uani 1 1 d . . .
H45 H 0.4060 0.3742 0.2660 0.061 Uiso 1 1 calc R . .
C25 C 0.5341(12) 0.8708(5) 0.4156(9) 0.035(3) Uani 1 1 d . . .
C13 C 0.5456(12) 0.5393(6) 0.5831(10) 0.043(3) Uani 1 1 d . . .
C41 C 0.3095(15) 0.9353(7) 0.4561(11) 0.058(4) Uani 1 1 d . . .
H7A1 H 0.3379 0.9151 0.4127 0.087 Uiso 1 1 calc R . .
H7A2 H 0.3175 0.9783 0.4512 0.087 Uiso 1 1 calc R . .
H7A3 H 0.2259 0.9253 0.4414 0.087 Uiso 1 1 calc R . .
C35 C 0.3831(15) 0.9152(5) 0.5546(12) 0.041(4) Uani 1 1 d . . .
 
loop_
 _atom_site_aniso_label
 _atom_site_aniso_U_11
 _atom_site_aniso_U_22
 _atom_site_aniso_U_33
 _atom_site_aniso_U_23
 _atom_site_aniso_U_13
 _atom_site_aniso_U_12
Pt1 0.04156(14) 0.03229(12) 0.04889(15) 0.0003(4) 0.01882(10) -0.0007(4)
C5 0.039(6) 0.045(7) 0.094(10) -0.015(6) 0.039(7) -0.004(5)
C3 0.070(7) 0.058(6) 0.092(8) 0.005(6) 0.035(6) -0.015(6)
C2 0.119(13) 0.080(10) 0.145(15) 0.003(10) 0.050(11) 0.005(9)
C1 0.079(10) 0.079(9) 0.119(14) 0.023(9) 0.052(10) 0.023(7)
N1 0.038(6) 0.062(7) 0.054(6) 0.008(5) 0.021(5) 0.006(5)
O1 0.070(8) 0.048(6) 0.045(6) -0.006(5) 0.015(5) -0.003(6)
O2 0.056(6) 0.027(4) 0.039(5) -0.005(4) 0.016(5) 0.003(4)
C30 0.040(8) 0.038(8) 0.045(8) 0.007(5) 0.026(7) -0.001(5)
B1 0.018(3) 0.039(3) 0.034(3) 0.007(8) 0.006(2) -0.004(8)
C37 0.040(7) 0.043(7) 0.040(7) 0.001(6) 0.023(5) -0.003(6)
C18 0.019(2) 0.028(2) 0.027(2) -0.007(7) 0.0097(18) -0.003(7)
C34 0.028(6) 0.025(6) 0.045(7) 0.010(5) 0.012(5) 0.004(5)
C40 0.068(9) 0.045(7) 0.025(5) 0.007(5) 0.003(6) 0.029(6)
C27 0.044(7) 0.038(7) 0.066(9) 0.001(6) 0.017(6) 0.003(6)
C26 0.036(7) 0.030(6) 0.037(6) 0.006(5) 0.023(5) 0.000(5)
C39 0.052(9) 0.037(7) 0.042(7) 0.002(6) 0.015(6) -0.003(6)
C32 0.105(14) 0.083(12) 0.111(13) 0.033(10) 0.082(11) 0.000(10)
C23 0.029(7) 0.048(7) 0.055(7) -0.003(6) 0.028(6) -0.004(6)
C21 0.054(9) 0.050(8) 0.077(10) -0.015(8) 0.022(8) -0.006(7)
C16 0.032(7) 0.036(7) 0.042(7) 0.003(5) 0.016(6) 0.012(5)
C38 0.075(10) 0.060(9) 0.029(6) -0.010(6) 0.033(6) -0.016(8)
C6 0.027(5) 0.012(3) 0.059(6) -0.014(4) 0.018(4) -0.002(3)
C24 0.033(7) 0.041(7) 0.082(10) 0.002(7) 0.025(7) -0.017(5)
C31 0.041(7) 0.069(10) 0.054(8) -0.001(7) 0.012(6) 0.004(7)
C17 0.019(5) 0.031(6) 0.035(6) 0.001(5) 0.009(5) 0.009(4)
C9 0.037(6) 0.017(4) 0.036(5) 0.003(4) 0.017(4) 0.002(4)
C10 0.084(10) 0.050(7) 0.033(5) 0.027(5) 0.017(6) 0.010(6)
C14 0.101(13) 0.058(9) 0.056(9) 0.018(7) 0.013(8) 0.023(8)
C19 0.037(7) 0.043(7) 0.036(7) 0.008(5) 0.016(6) 0.017(5)
C29 0.050(8) 0.037(7) 0.047(7) -0.004(6) 0.017(6) -0.008(6)
C11 0.055(8) 0.018(5) 0.048(8) -0.003(5) 0.009(7) 0.002(5)
C20 0.023(7) 0.039(7) 0.046(8) 0.010(6) 0.009(6) 0.005(5)
C15 0.038(4) 0.032(3) 0.040(3) -0.003(8) 0.009(3) -0.008(7)
C28 0.083(12) 0.041(7) 0.083(12) 0.026(8) 0.054(10) 0.017(8)
C36 0.058(9) 0.043(7) 0.086(11) -0.011(7) 0.055(9) -0.002(7)
C22 0.033(7) 0.035(7) 0.063(8) -0.002(6) 0.014(6) -0.004(6)
C33 0.055(9) 0.066(8) 0.068(10) -0.033(8) 0.035(8) -0.048(8)
C42 0.085(12) 0.055(9) 0.066(10) -0.015(7) 0.045(9) -0.020(8)
C12 0.035(4) 0.034(3) 0.051(4) -0.007(8) 0.008(3) 0.007(7)
S1 0.0691(19) 0.0623(18) 0.130(3) -0.0355(17) 0.0384(18) -0.0112(14)
C7 0.055(7) 0.140(14) 0.061(7) -0.067(8) 0.022(5) -0.023(7)
C8 0.058(7) 0.062(6) 0.026(5) -0.011(4) 0.007(4) -0.001(5)
C25 0.039(7) 0.030(6) 0.047(7) 0.009(6) 0.030(6) 0.005(5)
C13 0.034(7) 0.051(8) 0.046(8) -0.011(6) 0.017(6) 0.003(6)
C41 0.065(10) 0.056(8) 0.054(9) 0.009(8) 0.024(8) 0.001(8)
C35 0.035(8) 0.030(7) 0.060(10) 0.011(6) 0.021(7) 0.000(5)
 
_geom_special_details
;
 All s.u.'s (except the s.u. in the dihedral angle between two l.s. planes)
 are estimated using the full covariance matrix.  The cell s.u.'s are taken
 into account individually in the estimation of s.u.'s in distances, angles
 and torsion angles; correlations between s.u.'s in cell parameters are only
 used when they are defined by crystal symmetry.  An approximate (isotropic)
 treatment of cell s.u.'s is used for estimating s.u.'s involving l.s. planes.
;
 
loop_
 _geom_bond_atom_site_label_1
 _geom_bond_atom_site_label_2
 _geom_bond_distance
 _geom_bond_site_symmetry_2
 _geom_bond_publ_flag
Pt1 N1 1.978(6) . ?
Pt1 C9 1.998(8) . ?
Pt1 O2 1.997(8) . ?
Pt1 O1 2.071(10) . ?
C5 C4 1.3900 . ?
C5 N1 1.3900 . ?
C5 C6 1.469(9) . ?
C4 C3 1.3900 . ?
C3 C2 1.3900 . ?
C2 C1 1.3900 . ?
C1 N1 1.3900 . ?
O1 C11 1.213(15) . ?
O2 C13 1.358(16) . ?
C30 C29 1.327(19) . ?
C30 C25 1.350(18) . ?
C30 C33 1.54(2) . ?
B1 C34 1.55(2) . ?
B1 C18 1.596(7) . ?
B1 C25 1.627(19) . ?
C37 C38 1.34(2) . ?
C37 C36 1.36(2) . ?
C37 C42 1.406(19) . ?
C18 C19 1.36(2) . ?
C18 C17 1.452(19) . ?
C34 C39 1.455(17) . ?
C34 C35 1.480(18) . ?
C40 C39 1.511(18) . ?
C27 C26 1.406(17) . ?
C27 C28 1.44(2) . ?
C26 C25 1.392(17) . ?
C26 C31 1.539(18) . ?
C39 C38 1.364(17) . ?
C32 C28 1.61(2) . ?
C23 C19 1.531(17) . ?
C21 C16 1.498(18) . ?
C16 C17 1.410(17) . ?
C16 C15 1.42(2) . ?
C6 C9 1.391(12) . ?
C6 S1 1.739(9) . ?
C24 C20 1.552(16) . ?
C17 C22 1.514(17) . ?
C9 C8 1.340(13) . ?
C10 C11 1.449(17) . ?
C14 C13 1.62(2) . ?
C19 C20 1.401(18) . ?
C29 C28 1.39(2) . ?
C11 C12 1.49(2) . ?
C20 C15 1.38(2) . ?
C15 C12 1.514(8) . ?
C36 C35 1.45(2) . ?
C12 C13 1.33(2) . ?
S1 C7 1.858(17) . ?
C7 C8 1.360(19) . ?
C41 C35 1.50(2) . ?
 
loop_
 _geom_angle_atom_site_label_1
 _geom_angle_atom_site_label_2
 _geom_angle_atom_site_label_3
 _geom_angle
 _geom_angle_site_symmetry_1
 _geom_angle_site_symmetry_3
 _geom_angle_publ_flag
N1 Pt1 C9 80.5(3) . . ?
N1 Pt1 O2 97.8(4) . . ?
C9 Pt1 O2 178.2(4) . . ?
N1 Pt1 O1 171.2(4) . . ?
C9 Pt1 O1 90.7(5) . . ?
O2 Pt1 O1 91.04(16) . . ?
C4 C5 N1 120.0 . . ?
C4 C5 C6 139.8(7) . . ?
N1 C5 C6 100.2(7) . . ?
C5 C4 C3 120.0 . . ?
C2 C3 C4 120.0 . . ?
C3 C2 C1 120.0 . . ?
C2 C1 N1 120.0 . . ?
C1 N1 C5 120.0 . . ?
C1 N1 Pt1 115.9(5) . . ?
C5 N1 Pt1 124.1(5) . . ?
C11 O1 Pt1 124.1(10) . . ?
C13 O2 Pt1 126.3(8) . . ?
C29 C30 C25 122.5(14) . . ?
C29 C30 C33 115.3(12) . . ?
C25 C30 C33 122.0(12) . . ?
C34 B1 C18 119.8(14) . . ?
C34 B1 C25 120.4(5) . . ?
C18 B1 C25 119.8(14) . . ?
C38 C37 C36 116.0(13) . . ?
C38 C37 C42 123.5(13) . . ?
C36 C37 C42 120.5(14) . . ?
C19 C18 C17 119.3(4) . . ?
C19 C18 B1 122.3(14) . . ?
C17 C18 B1 118.3(14) . . ?
C39 C34 C35 112.8(12) . . ?
C39 C34 B1 124.4(11) . . ?
C35 C34 B1 122.3(12) . . ?
C26 C27 C28 120.0(13) . . ?
C25 C26 C27 117.5(12) . . ?
C25 C26 C31 127.0(11) . . ?
C27 C26 C31 115.5(11) . . ?
C38 C39 C34 122.8(13) . . ?
C38 C39 C40 121.2(12) . . ?
C34 C39 C40 116.0(11) . . ?
C17 C16 C15 121.2(10) . . ?
C17 C16 C21 119.2(12) . . ?
C15 C16 C21 119.6(12) . . ?
C37 C38 C39 125.2(13) . . ?
C9 C6 C5 127.2(8) . . ?
C9 C6 S1 115.4(7) . . ?
C5 C6 S1 117.3(7) . . ?
C16 C17 C18 117.0(10) . . ?
C16 C17 C22 121.5(10) . . ?
C18 C17 C22 121.3(10) . . ?
C8 C9 C6 111.7(9) . . ?
C8 C9 Pt1 140.2(8) . . ?
C6 C9 Pt1 108.1(7) . . ?
C18 C19 C20 123.8(11) . . ?
C18 C19 C23 121.2(11) . . ?
C20 C19 C23 115.0(11) . . ?
C30 C29 C28 121.1(14) . . ?
O1 C11 C10 116.9(13) . . ?
O1 C11 C12 128.6(13) . . ?
C10 C11 C12 114.4(11) . . ?
C15 C20 C19 117.9(11) . . ?
C15 C20 C24 118.8(12) . . ?
C19 C20 C24 123.2(11) . . ?
C20 C15 C16 120.4(5) . . ?
C20 C15 C12 124.2(14) . . ?
C16 C15 C12 115.0(14) . . ?
C29 C28 C27 117.4(14) . . ?
C29 C28 C32 125.4(16) . . ?
C27 C28 C32 117.0(16) . . ?
C37 C36 C35 125.0(14) . . ?
C13 C12 C11 124.4(6) . . ?
C13 C12 C15 119.2(14) . . ?
C11 C12 C15 116.0(14) . . ?
C6 S1 C7 86.3(5) . . ?
C8 C7 S1 110.0(7) . . ?
C9 C8 C7 116.5(11) . . ?
C30 C25 C26 121.2(12) . . ?
C30 C25 B1 121.4(13) . . ?
C26 C25 B1 117.4(11) . . ?
C12 C13 O2 125.4(12) . . ?
C12 C13 C14 125.4(12) . . ?
O2 C13 C14 109.2(11) . . ?
C36 C35 C34 118.1(14) . . ?
C36 C35 C41 119.1(13) . . ?
C34 C35 C41 122.8(14) . . ?
 
_diffrn_measured_fraction_theta_max    0.998
_diffrn_reflns_theta_full              27.46
_diffrn_measured_fraction_theta_full   0.998
_refine_diff_density_max    0.770
_refine_diff_density_min   -0.789
_refine_diff_density_rms    0.253
